# Supplementary material for: Fleeting reliability in the dot-probe task
Source: Springer Nature journal article supplement (doi:10.1007/s00426-017-0947-6), 2017-11-20
Supplement: MOESM1 [file 15244830]

Table S1. *Mean (SD) reliability of RTs a function of cue valence and SOA in each Experiment*

| Condition | Experiment 1A | Experiment 1B | Experiment 2 | Experiment 3 |
| --- | --- | --- | --- | --- |
| 100 ms SOA |  |  |  |  |
| Neutral | .874 (.026) | .901 (.021) | .926 (.014) | .927 (.015) |
| Angry | .867 (.028) | .905 (.020) | .919 (.014) | .931 (.014) |
| 300 ms SOA |  |  |  |  |
| Neutral | .880 (.024) |  |  |  |
| Angry | .888 (.022) |  |  |  |
| 500 ms SOA |  |  |  |  |
| Neutral | .883 (.024) | .900 (.020) | .933 (.012) | .926 (.015) |
| Angry | .867 (.026) | .906 (.020) | .927 (.013) | .918 (.016) |
| 900 ms SOA |  |  |  |  |
| Neutral |  | .915 (.019) |  |  |
| Angry |  | .910 (.018) |  |  |
